# Supplementary material for: Polyacrylonitrile/UV329/titanium oxide composite nanofibrous membranes with enhanced UV protection and filtration performance
Source: Royal Society of Chemistry journal article supplement (doi:10.1039/d3ra02470a), 2023-01-01
Supplement: d3ra02470a1.pdf [file d3ra02470a1.pdf]

## Supporting Information for

### **Polyacrylonitrile/UV329/titanium oxide composite nano-fibrous membranes with enhanced UV protection and filtration performance**

Junlu Sheng,<sup>a,b</sup> Shuiping Ding,<sup>a</sup> Haiyan Liao,<sup>a</sup> Yongbo Yao,<sup>\*a</sup> Yunyun Zhai,<sup>c</sup> Jianchao Zhan,<sup>a</sup> and Xueqin Wang<sup>\*d</sup>

<sup>a</sup> College of Materials and Textile Engineering, Nanotechnology Research Institute, Jiaying University, Jiaying 314001, China. Email: yaoyongbo@foxmail.com

<sup>b</sup> Key Laboratory of Yarn Materials Forming and Composite Processing Technology of Zhejiang Province, Jiaying University, Jiaying 314001, China.

<sup>c</sup> Jiaying Key Laboratory of Molecular Recognition and Sensing, College of Biological, Chemical Sciences and Engineering, Jiaying University, Jiaying 314001, China.

<sup>d</sup> College of Textiles and Clothing, Qingdao University, Shandong 266071, China. Email: xqwang1989@163.com

## UPF calculation

UV protection factor (UPF) indicates the ability of a fabric to protect people against UV rays in the 290-400 nm wavelength band. The UPF is the ratio between the average effective UV irradiance on unprotected skin and that on protected skin. The UPF calculation formula is as follows:

$$\text{UPF} = \frac{\sum_{290}^{400} E_{\lambda} \times S_{\lambda} \times \Delta\lambda}{\sum_{290}^{400} E_{\lambda} \times S_{\lambda} \times T_{\lambda} \times \Delta\lambda} \quad (1)$$

where  $\lambda$  denotes the UV light wave wavelength, and its unit is nm;  $T_{\lambda}$  denotes the UV transmittance at a wavelength of  $\lambda$  whose unit is %;  $E_{\lambda}$  denotes the UV spectral energy efficiency relative to the red spot;  $\Delta\lambda$  denotes the UV light wave length spacing, the whose unit is nm;  $S_{\lambda}$  denotes the solar spectral radiant energy, whose unit is  $\text{W m}^{-2}\text{nm}^{-1}$ .

UV transmittance is divided into  $T(\text{UVA})_{\text{AV}}$  and  $T(\text{UVB})_{\text{AV}}$  according to wavelength, which refer to the transmittance of the UV transmittance of 315~400nm and 190~315 nm wavelengths, respectively. The calculated of the method is as follows:

$$T(\text{UVA})_{\text{AV}} = \frac{\sum_{315}^{400} T_{\lambda} \times \Delta\lambda}{\sum_{315}^{400} \Delta\lambda} \quad (2)$$

$$T(\text{UVB})_{\text{AV}} = \frac{\sum_{290}^{315} T_{\lambda} \times \Delta\lambda}{\sum_{290}^{315} \Delta\lambda} \quad (3)$$

### **Filtration performance test**

An automated filter tester provided by Huada Filter Technology Co., Ltd., China was used to measure the filtration efficiency and air flow resistance of the membranes. To measure the filtration performance, the fibrous membranes were put on a filter holder. The tester could deliver charge neutralized monodisperse solid NaCl aerosol particles that had a mass mean diameter of 300-500 nm and a geometric standard deviation not exceeding 1.86. The neutralized NaCl aerosol particles were feed into a filter holder and down through the filter with 100 cm<sup>2</sup> of effective area. The filter air flow resistance was measured with the combination of a flow meter and two electronic pressure transducers that detected the pressure drop through the filtration medium under testing.

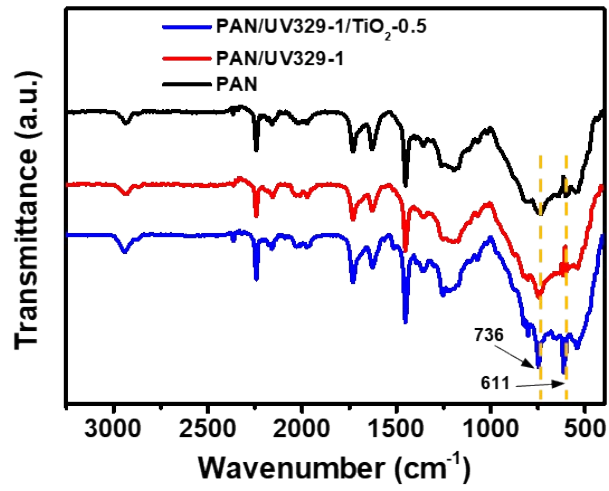

**Fig. S1** FT-IR spectra of PAN, PAN/UV329-1, and PAN/UV329-1/TiO<sub>2</sub>-0.5 nanofibrous membranes.

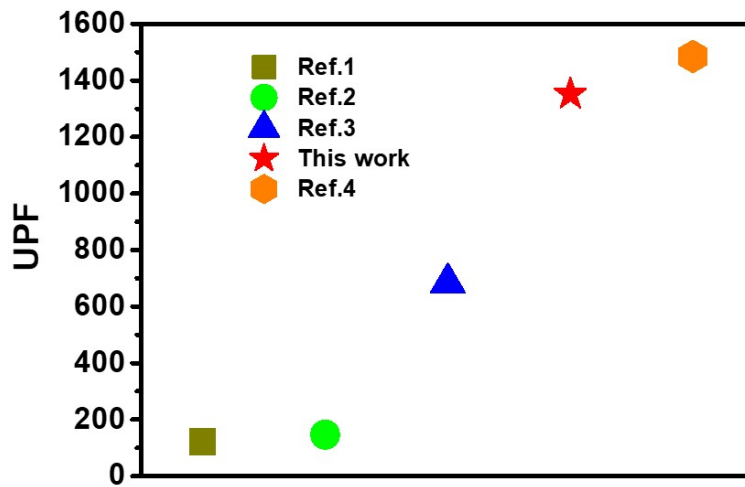

**Fig. S2** Comparative analysis with the reported works.

**Table S1** The average fibre diameter, mean pore diameter and filtration performance of PAN, PAN/UV329-1, PAN/UV329-1/TiO<sub>2</sub>-0.5 nanofibrous membranes.

| <b>Samples</b>                                          | <b>Average fibre diameter (nm)</b> | <b>Mean pore diameter (nm)</b> | <b>Filtration efficiency (%)</b> | <b>Pressure drop (Pa)</b> |
|---------------------------------------------------------|------------------------------------|--------------------------------|----------------------------------|---------------------------|
| PAN nanofibrous membranes                               | 404                                | 1.8                            | 99.90                            | 273                       |
| PAN/UV329-1 nanofibrous membranes                       | 448                                | 2.1                            | 99.83                            | 188                       |
| PAN/UV329-1/TiO <sub>2</sub> -0.5 nanofibrous membranes | 572                                | 2.8                            | 99.57                            | 145                       |
